# Supplementary material for: A microporous europium–organic framework anchored with open –COOH groups for selective cation sensing
Source: Royal Society of Chemistry journal article supplement (doi:10.1039/c6ce01801g), 2016-01-01
Supplement: c6ce01801g1.pdf [file c6ce01801g1.pdf]

## SUPPORTING INFORMATION

### **A microporous europium–organic framework anchored with open -COOH groups for selective cation sensing\*\***

Jinjie Qian<sup>\*a</sup>, Panpan Yu<sup>a</sup> and Shaoming Huang<sup>\*a</sup>

<sup>a</sup>*College of Chemistry and Materials Engineering, Wenzhou University, Wenzhou 325035, P. R. China.*

*\*To whom correspondence should be addressed: E-mail: [jinjieqian@wzu.edu.cn](mailto:jinjieqian@wzu.edu.cn); Tel: 86-577-88373064.*

#### **Table of Content**

|                                                                                      |        |
|--------------------------------------------------------------------------------------|--------|
| S1. Materials and Methods                                                            | S1-S3  |
| S2. Additional X-ray Crystal Structural Figure                                       | S4     |
| S3. Topological Analysis Results                                                     | S5-S6  |
| S4. PXRD and TGA data                                                                | S7-S8  |
| S5. Excitation and Emission Curves for Different <b>M<sup>n+</sup>-BMM-7</b> Samples | S9-S13 |
| S6. N <sub>2</sub> isotherms of non-activated and activated <b>BMM-7</b>             | S14    |
| S7. References                                                                       | S14    |

## S1. Materials and Methods

### 1.1. Materials and Instruments.

Reactions were carried out in 25 ml Teflon-lined autoclave under autogenous pressure. All the reactants are of reagent-grade quality and used as commercially purchased without further purification. The power X-ray diffraction patterns (PXRD) were collected by a Bruker D8 Advance using Cu K $\alpha$  radiation ( $\lambda = 0.154$  nm). Single gas adsorption measurements were performed in the Accelerated Surface Area and Porosimetry 2020 (ASAP2020) System, in which **BMM-7** was determined in a clean ultra high vacuum system and the N<sub>2</sub> sorption measurement was performed at 77 K. Elemental analyses for C, H, N were carried out on a German Elementary Vario EL III instrument. Thermogravimetric analyses were recorded on a NETZSCH STA 449C unit at a heating rate of 10 °C·min<sup>-1</sup> under flowing nitrogen atmosphere. Scanning transmission electron microscopy (STEM) and energy dispersive X-ray spectroscopy (EDS) analyses were carried out under JEOL JEM-2100F microscope operating at an accelerating voltage of 200 kV. Fluorescent spectra were measured on an Edinburgh Instruments analyzer model FLS920 with 450W xenon light.

### 1.2. Synthesis of [Eu<sub>2</sub>(BPTC)(H<sub>2</sub>BPTC)(DMF)<sub>4</sub>]•4DMF•10H<sub>2</sub>O (**BMM-7**)

A mixture of Eu(NO<sub>3</sub>)<sub>3</sub> (0.10 mmol, 45 mg) and H<sub>4</sub>BPTC (0.10 mmol, 33 mg, H<sub>3</sub>BPTC = Biphenyl-3,3',5,5'-tetracarboxylic acid) in the solvent of N,N'-Dimethylformamide (DMF, 5 mL) with an additional drop of HNO<sub>3</sub> (0.1 ml, 65 wt %) was sealed in a 25 ml autoclave, which was heated at 150 °C for 4 days, and cooled gradually to room temperature in 1 day. After washed by fresh DMF and ethanol solvent in turn, the colorless crystals were obtained in *ca.* ~50% yield based on the organic ligand. Elemental analysis was calculated for **BMM-7**: C, 39.03%; H, 5.26%; N, 6.50%. Found: C, 38.84%; H, 5.49%; N, 6.29%. The phase purity of the sample is confirmed by PXRD (Figure S4). Moreover, the as-synthesized crystals and the Cu(II)-trapped **BMM-7** sample (**Cu<sup>2+</sup>-BMM-7**) have also been confirmed by EDX and the elemental mapping in main article, respectively.

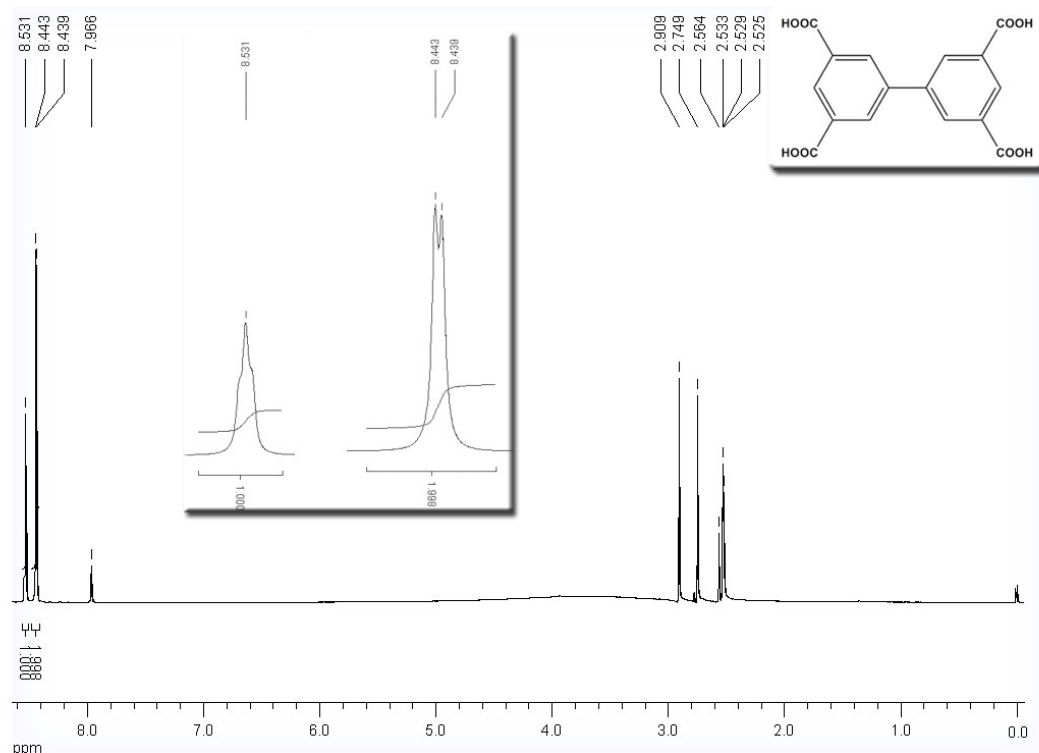

**Figure S1.**  $^1\text{H}$ -NMR spectrum of the  $\text{H}_4\text{BPTC}$  ligand was measured in  $\text{DMSO-d}_6$ .

### 1.3. Single-Crystal X-ray Crystallography

The structure data of **BMM-7** were collected on a SuperNova, Dual, Cu at zero, Atlas diffractometer. The crystal was kept at 100 K during data collection. By Using Olex2,<sup>S1</sup> the structure was solved with the ShelXS<sup>S2</sup> structure solution program using Direct Methods and refined with the ShelXL<sup>S3</sup> refinement package using Least Squares minimisation. Crystallographic data and structure refinement parameters for this single crystal are listed in Table S1 below. In the meantime, we have also applied PLATON/SQUEEZE<sup>S4</sup> to calculate the contribution to the diffraction from the solvent region and thereby produced a set of solvent-free diffraction intensities. The final formulae were calculated from the SQUEEZE results combined with elemental analysis data and TGA data. The solvent-squeezed structure was denoted as **BMM-7-Squeezed**. More details on the crystallographic studies as well as atomic displacement parameters are given in Supporting Information as CIF files. Crystallographic data for the structure reported in this paper has been deposited. The following crystal structure has been deposited at the Cambridge Crystallographic Data Centre and allocated the

deposition number (CCDC No.) 1496638 and 1496639 for **BMM-7** and **BMM-7-Squeezed**, respectively. These data can be obtained free of charge via [www.ccdc.cam.ac.uk/data\\_request/cif](http://www.ccdc.cam.ac.uk/data_request/cif).

**Table S1. Summary of Crystal Data and Refinement Results**

| Items                      | <b>BMM-7</b>                                                     | <b>BMM-7-Squeezed</b>                                            |
|----------------------------|------------------------------------------------------------------|------------------------------------------------------------------|
| formula                    | EuC <sub>28</sub> N <sub>4</sub> O <sub>12</sub> H <sub>35</sub> | EuC <sub>22</sub> N <sub>2</sub> O <sub>10</sub> H <sub>20</sub> |
| M                          | 771.56                                                           | 624.36                                                           |
| crystal system             | Triclinic                                                        | Triclinic                                                        |
| space group                | <i>P</i> -1 (#. 2)                                               | <i>P</i> -1 (#. 2)                                               |
| <i>a</i> (Å)               | 10.4640(4)                                                       | 10.4702(4)                                                       |
| <i>b</i> (Å)               | 12.0162(5)                                                       | 12.0131(5)                                                       |
| <i>c</i> (Å)               | 13.1846(5)                                                       | 13.1765(6)                                                       |
| $\alpha$ (°)               | 83.780(3)                                                        | 83.827(4)                                                        |
| $\beta$ (°)                | 86.014(3)                                                        | 85.920(4)                                                        |
| $\gamma$ (°)               | 75.659(4)                                                        | 75.686(4)                                                        |
| <i>V</i> (Å <sup>3</sup> ) | 1595.12(11)                                                      | 1594.86(12)                                                      |
| <i>T</i> (K)               | 173 (2)                                                          | 173 (2)                                                          |
| <i>Z</i>                   | 2                                                                | 2                                                                |
| F(000)                     | 780                                                              | 618                                                              |
| R <sub>int</sub>           | 0.0350                                                           | 0.0292                                                           |
| R <sub>1</sub> (I>2σ(I))   | 0.0305                                                           | 0.0278                                                           |
| wR <sub>2</sub>            | 0.0672                                                           | 0.0725                                                           |
| Goof                       | 1.036                                                            | 1.044                                                            |
| CCDC number                | 1496638                                                          | 1496639                                                          |

***BMM*** denotes *Bifunctional Method Material*; More details see CIF files.

## S2. Additional X-ray Crystal Structural Figures

### Asymmetric Unit

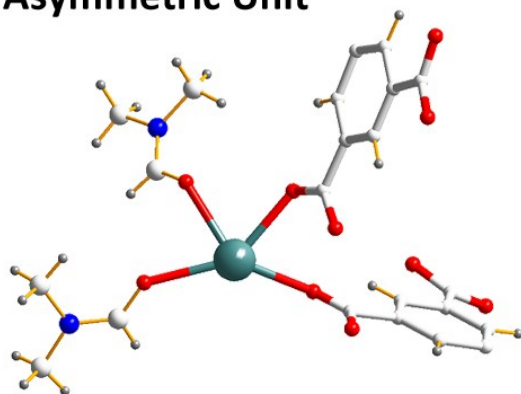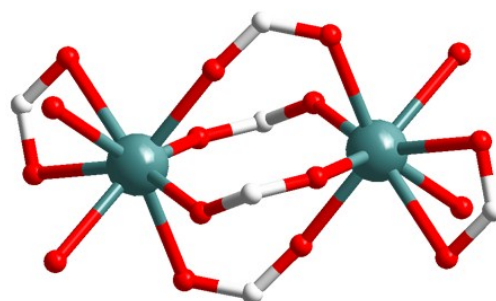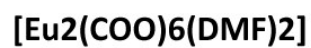

**Figure S2.** Asymmetric unit and secondary building unit for **BMM-7**, respectively.

### BPTC-1

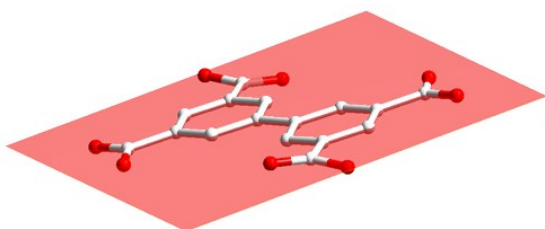

### BPTC-2

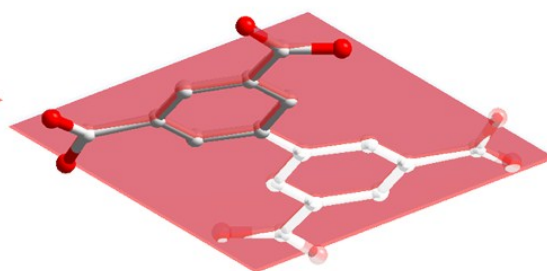

**Dihedral Angel (DA-1) = 0°    Dihedral Angel (DA-2)= 0°**

**Figure S3.** The dihedral angels of BPTC-1 and BPTC-2 in the **BMM-7**, and their values are 0°.

### S3. Topological Analysis Results by TOPOS 4.0

1:C22 H20 Eu N2 O10 (BMM-7)

Topology for BPTC-1

-----

BPTC-1 links by bridge ligands and has

| Common vertex with |        |         |         |          | R(A-A)  |   |
|--------------------|--------|---------|---------|----------|---------|---|
| SBU                | 0.0000 | 0.5000  | 0.5000  | ( 0 0 0) | 6.924A  | 1 |
| SBU                | 1.0000 | -0.5000 | 0.5000  | ( 1-1 0) | 6.924A  | 1 |
| SBU                | 1.0000 | 0.5000  | 0.5000  | ( 1 0 0) | 8.890A  | 1 |
| SBU                | 0.0000 | -0.5000 | 0.5000  | ( 0-1 0) | 8.890A  | 1 |
| BPTC-1             | 0.5000 | 0.0000  | -0.5000 | ( 0 0-1) | 13.177A | 1 |
| BPTC-1             | 0.5000 | 0.0000  | 1.5000  | ( 0 0 1) | 13.177A | 1 |

Topology for SBU

-----

SBU [Eu<sub>2</sub>(COO)<sub>6</sub>(DMF)<sub>2</sub>] links by bridge ligands and has

| Common vertex with |         |        |        |          | R(A-A) |   |
|--------------------|---------|--------|--------|----------|--------|---|
| BPTC-1             | 0.5000  | 0.0000 | 0.5000 | ( 0 0 0) | 6.924A | 1 |
| BPTC-1             | -0.5000 | 1.0000 | 0.5000 | (-1 1 0) | 6.924A | 1 |
| BPTC-1             | -0.5000 | 0.0000 | 0.5000 | (-1 0 0) | 8.890A | 1 |
| BPTC-1             | 0.5000  | 1.0000 | 0.5000 | ( 0 1 0) | 8.890A | 1 |

-----

Structure consists of 3D framework with Eu-BPTC

Coordination sequences

-----

BPTC-1: 1 2 3 4 5 6 7 8 9 10  
 Num 6 18 38 66 102 146 198 258 326 402  
 Cum 7 25 63 129 231 377 575 833 1159 1561

-----

SBU: 1 2 3 4 5 6 7 8 9 10  
 Num 4 16 38 66 102 146 198 258 326 402  
 Cum 5 21 59 125 227 373 571 829 1155 1557

-----

TD10=1559

Vertex symbols for selected sublattice

-----  
BPTC-1 Point (Schlafli) symbol:  $\{4^4.6^{10}.8\}$

Extended point symbol:  $[4.4.4.4.6(2).6(2).6(5).6(5).6(5).6(5).6(5).6(5).6(5).6(5).8(20)]$

-----  
SBU Point (Schlafli) symbol:  $\{4^4.6^2\}$

Extended point symbol:  $[4.4.4.4.6(4).6(4)]$

-----  
Point (Schlafli) symbol for net:  $\{4^4.6^{10}.8\} \{4^4.6^2\}$

4,6-c net with stoichiometry (4-c)(6-c); 2-nodal net

Topological type: **fsc**

#### S4. PXRD and TGA data

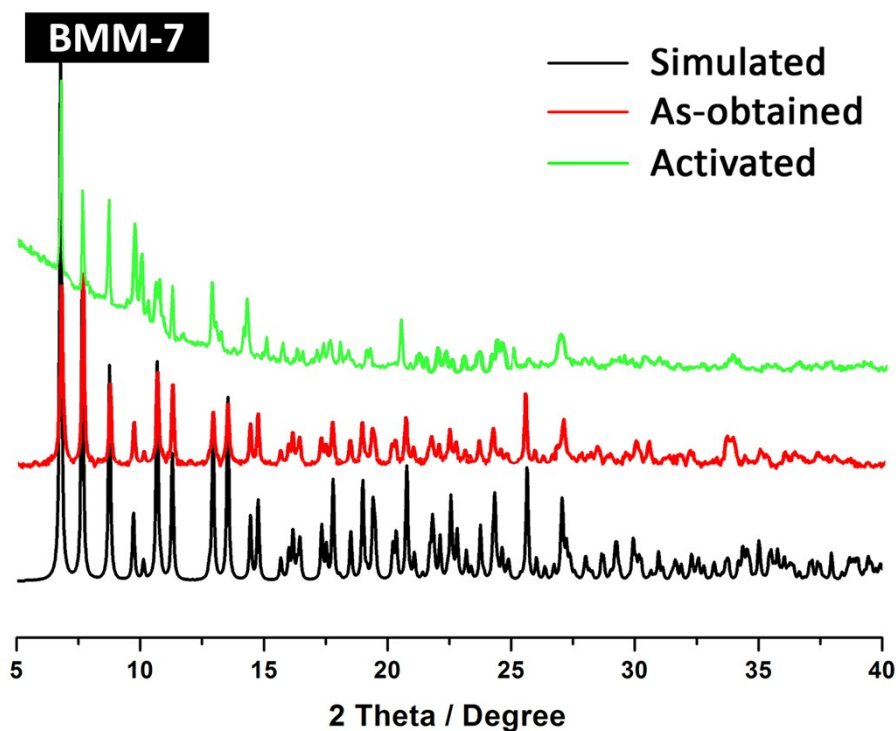

**Figure S4.** PXRD patterns of crystalline materials used in the manuscript: simulated from the crystallographic information file (black); from the as-prepared sample (red); from the desolvated sample by thermal activation (green).

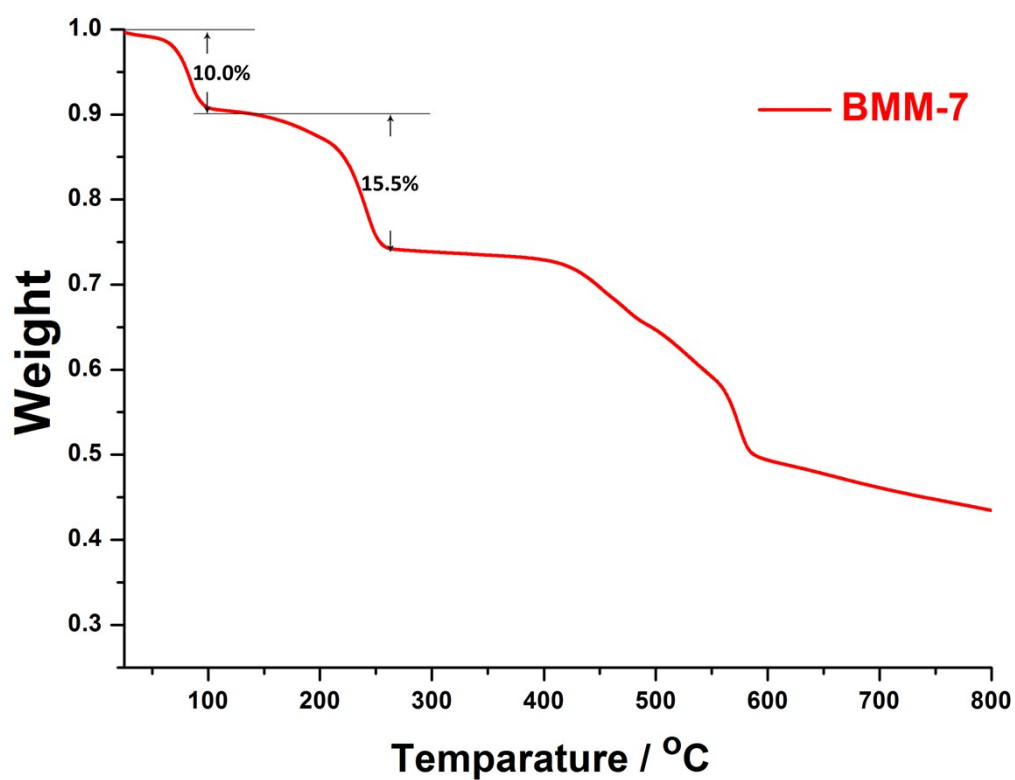

**Figure S5.** TGA curves for BMM-7.



The thermogravimetric analysis (TGA) was carried out on polycrystalline samples of BMM-7 in the temperature range from 25 to 800 °C in the flowing N<sub>2</sub> atmosphere with a heating rate of 5 °C min<sup>-1</sup> (plz see Fig. S5 on Page S7).

At the beginning, BMM-7 displays a weight loss of 10.0% (cal. 10.45%) at the temperature of 100 °C, which corresponds to the loss of guest uncoordinated water molecules.

After that, it turns out to be a continuous weight loss of 15.5% (cal. 15.6%) in the temperature range of 100-260 °C, which is attributed to the departure of uncoordinated DMF molecules in the microporous channels. The terminally coordinated DMF molecules are not going to decompose at this point.

Finally, with the increasing temperature, the main framework of BMM-7 is starting to collapse, and the coordination bonds between Eu(III) centres and ligands is going to break down, the BPTC ligands and DMF molecules are going to deteriorate seriously, which is presented in TGA curves with a continuous weight loss until 850 °C.

## S5. Excitation and Emission Curves for Different $M^{n+}$ -BMM-7 Samples

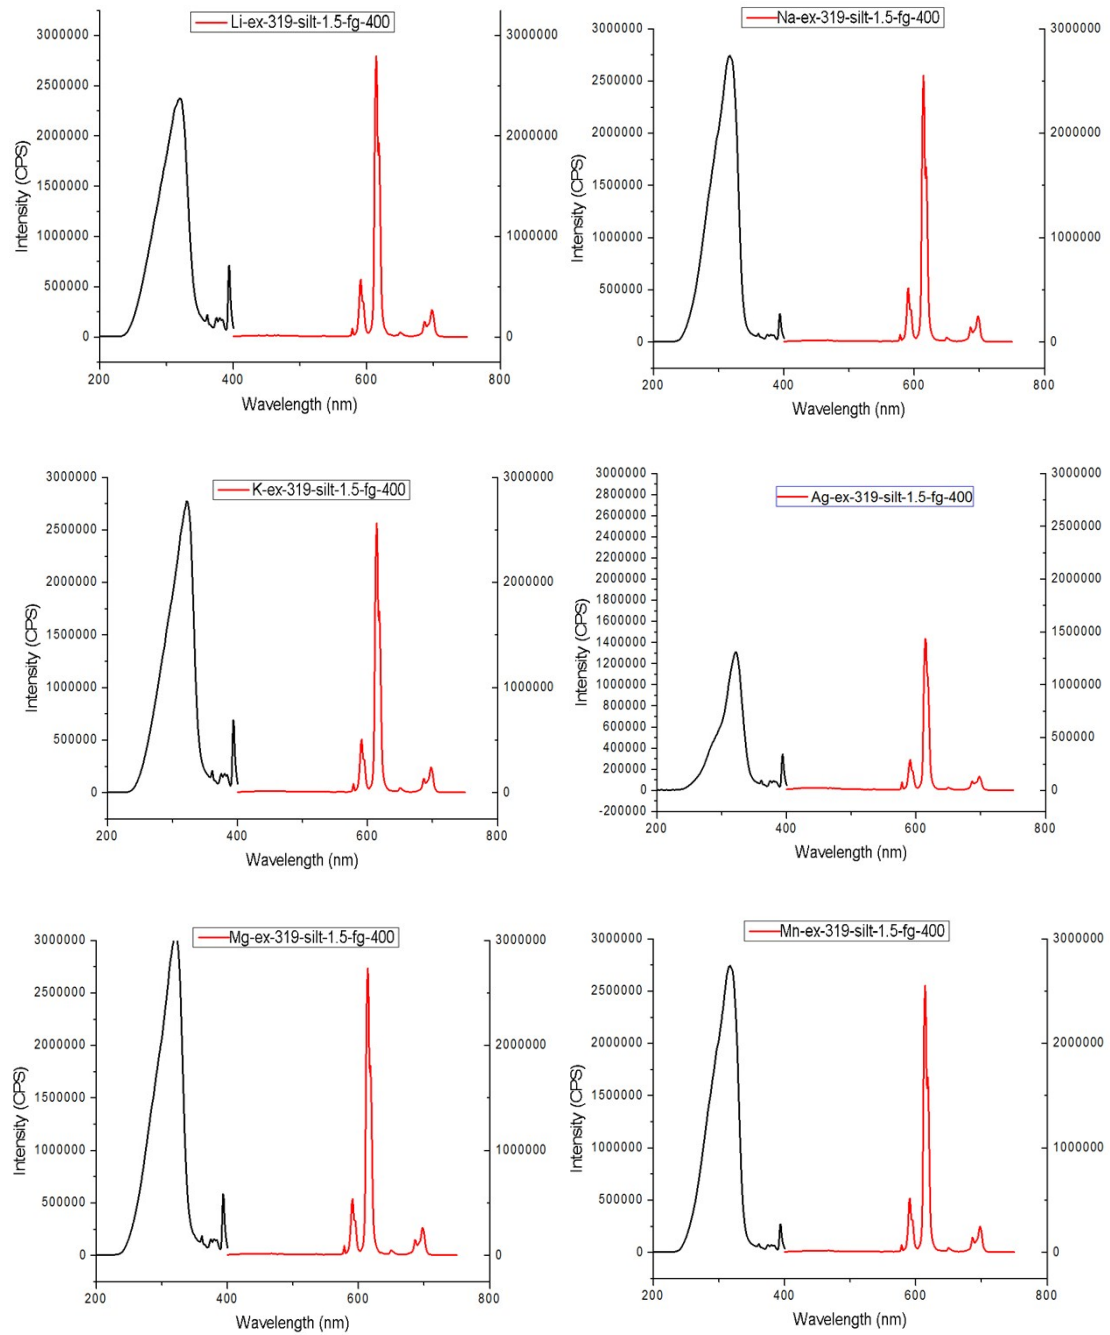

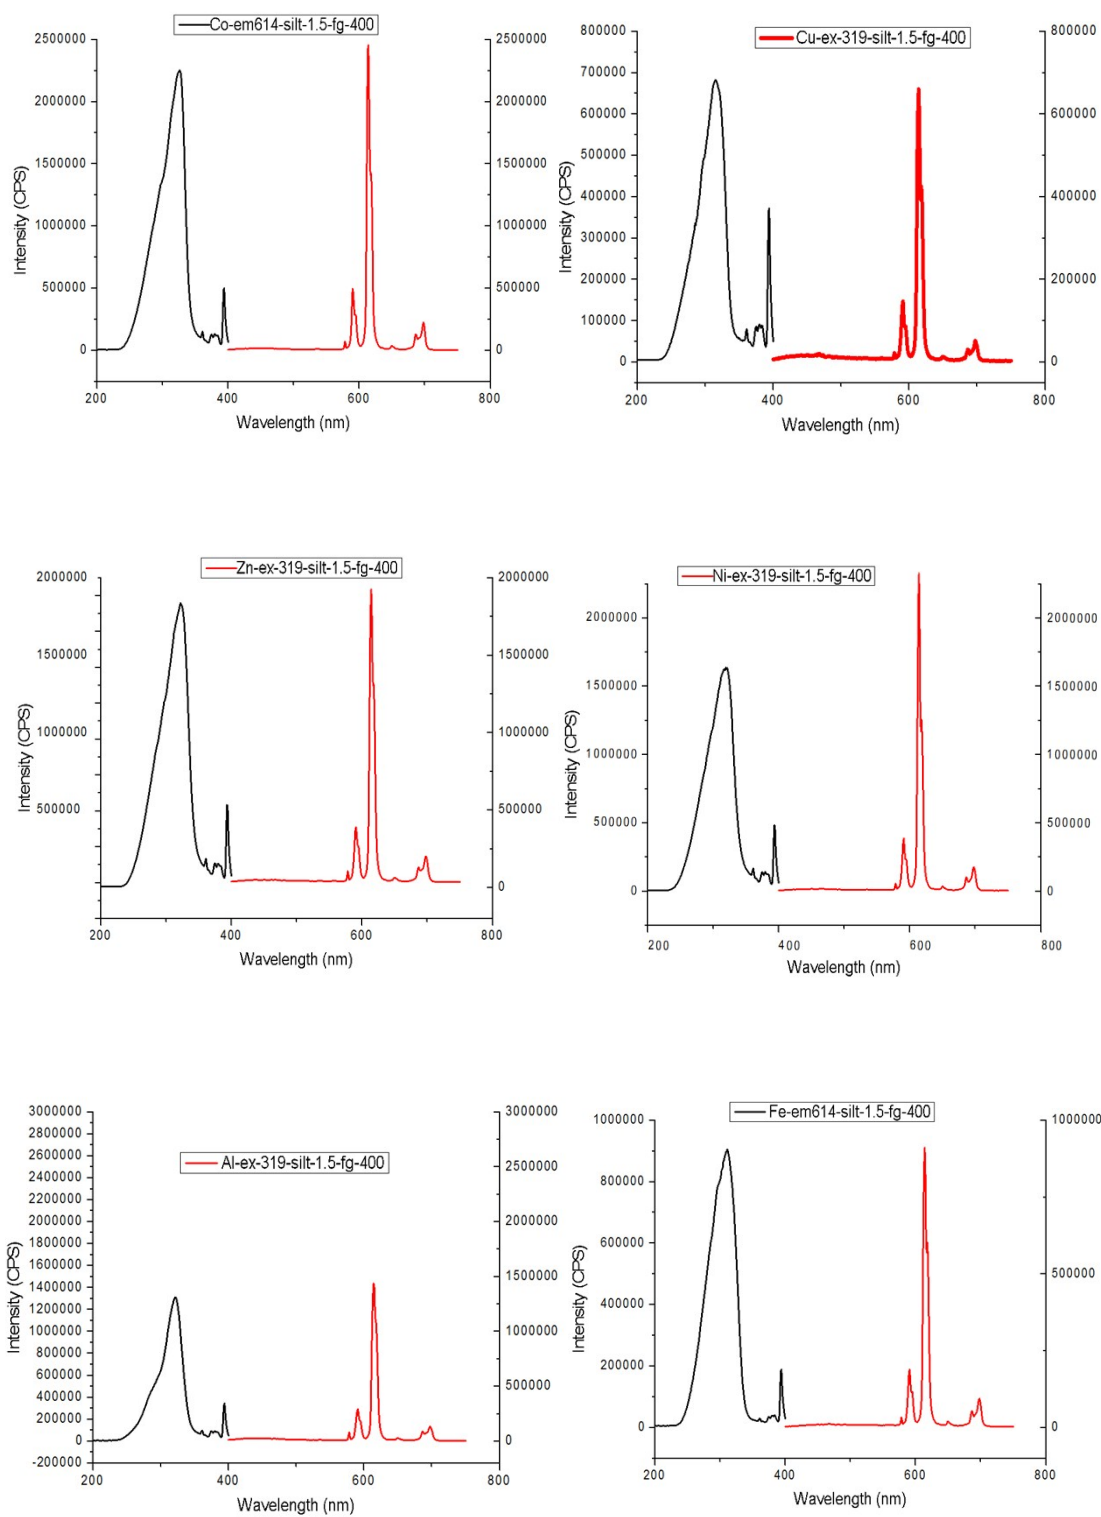

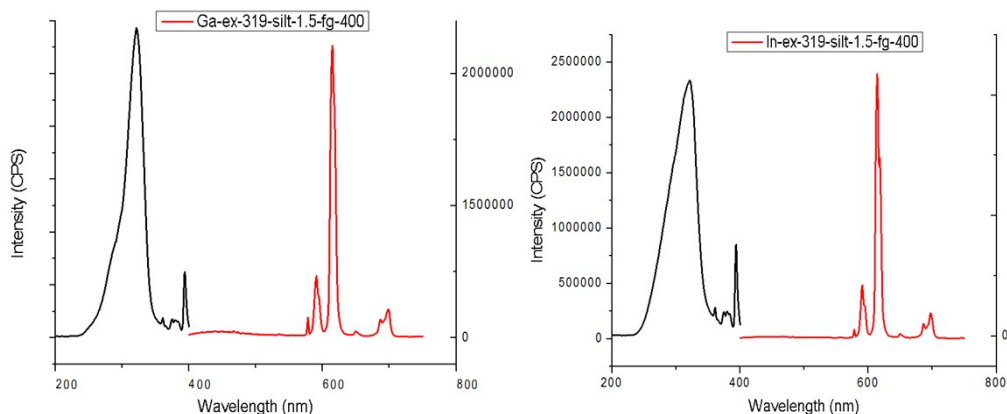

**Figure S6** (a) The excitation (black,  $\lambda_{em} = 614$  nm) and emission spectra (red,  $\lambda_{ex} = 319$  nm) of  $M^{n+}$ -BMM-7, solid state samples at room temperature. And the metal ions are  $Li^+$ ,  $Na^+$ ,  $K^+$ ,  $Ag^+$ ,  $Mg^{2+}$ ,  $Mn^{2+}$ ,  $Co^{2+}$ ,  $Cu^{2+}$ ,  $Zn^{2+}$ ,  $Ni^{2+}$ ,  $Al^{3+}$ ,  $Fe^{3+}$ ,  $Ga^{3+}$ ,  $In^{3+}$ , respectively (from top left to bottom right)

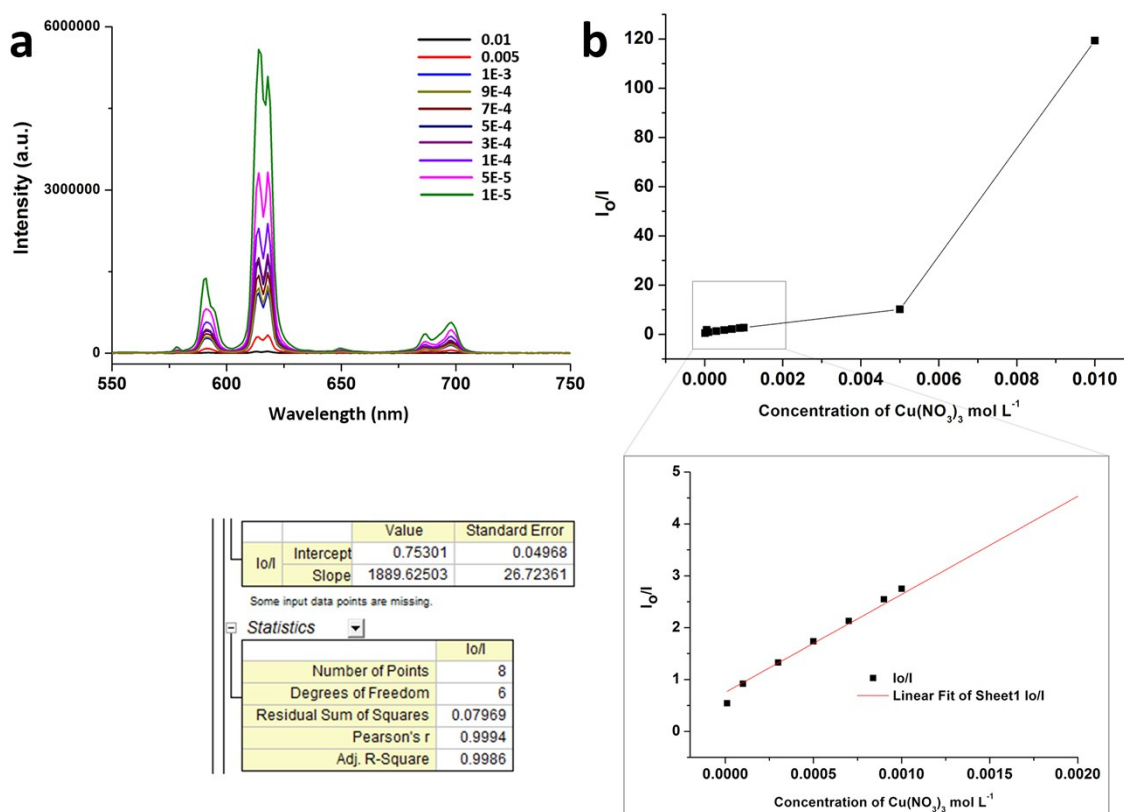

**Figure S7** (a) Luminescence intensity of BMM-7 suspension with different concentrations of  $Cu(NO_3)_2$ . (b) and (c) Stern-Volmer plot with the fitting factors.

First, in order to determine the linear range and limit of detection for the sensitivity of  $Cu(II)$  cations, the compound was dispersed in ethanol solutions with varying concentrations of  $Cu(II)$  ions. As presented in Fig. 4 on Page 4 in the main

article, the luminescence intensity at 614 nm of Eu(III) ions is decreased obviously as the concentration of copper ions increase gradually, and BMM-7 shows nearly no emission when the concentration of Cu(II) cations increases to 0.01 mol L<sup>-1</sup>.

With the increasing concentration of Cu(III) ions, the emission intensity of EtOH-suspended stock solution of BMM-7 decreased gradually in the concentration range of 10<sup>-5</sup> to 10<sup>-2</sup> mol L<sup>-1</sup> (Fig. 7a). What should be emphasized here is that in the concentration range of 10<sup>-4</sup> to 10<sup>-3</sup> mol L<sup>-1</sup>, a good linear correlation ( $R^2 = 0.9986$ ) between the quenching efficiency and the amount of Cu(II) was observed (Fig. 7b), despite the  $I_0/I$  curve cannot severely fit linearly under the high concentration (> 0.01 mol L<sup>-1</sup>).

Second, the quenching effect can be verified by the quenching effect coefficient ( $K_{sv}$ ), based on the luminescent data, which is calculated according to the Stern-Volmer equation:

$$I_0/I = 1 + K_{sv}[M]$$

in which the values of  $I_0$  and  $I$  are the luminescent intensity of metal-ion-free and metal-ion-incorporated BMM-7 in alcoholic solutions, respectively.  $[M]$  is the molar concentration of metal ion. As listed in Table S2 as blow, Cu(II) ions show the highest value of 360.7 M<sup>-1</sup>, indicating that Cu(II) ions have the most distinct quenching effect on the luminescent intensity of BMM-7.

**Table. S2 Quenching effect coefficients ( $K_{sv}$ ) of different metal ions on the luminescence intensity of metal-ion-incorporated BMM-7.**

| <b>Metal ion</b>       | <b><math>{}^5D_0 - {}^7F_2</math></b> | <b><math>K_{sv}</math></b> |
|------------------------|---------------------------------------|----------------------------|
| Li <sup>+</sup>        | 2798220                               | 8.6                        |
| Na <sup>+</sup>        | 2.665290                              | 14.0                       |
| K <sup>+</sup>         | 2568190                               | 18.4                       |
| Ag <sup>+</sup>        | 1787720                               | 70.0                       |
| Mg <sup>2+</sup>       | 2735630                               | 11.1                       |
| Mn <sup>2+</sup>       | 2554300                               | 19.0                       |
| Co <sup>2+</sup>       | 2454730                               | 23.8                       |
| <b>Cu<sup>2+</sup></b> | <b>659800</b>                         | <b>360.7</b>               |
| Zn <sup>2+</sup>       | 1918200                               | 58.5                       |
| Ni <sup>2+</sup>       | 1893290                               | 60.5                       |
| Al <sup>3+</sup>       | 1638000                               | 85.6                       |
| Fe <sup>3+</sup>       | 1502010                               | 102.3                      |
| Ga <sup>3+</sup>       | 2070130                               | 46.8                       |
| In <sup>3+</sup>       | 2398700                               | 26.7                       |

## S6. N<sub>2</sub> isotherms of non-activated and activated BMM-7

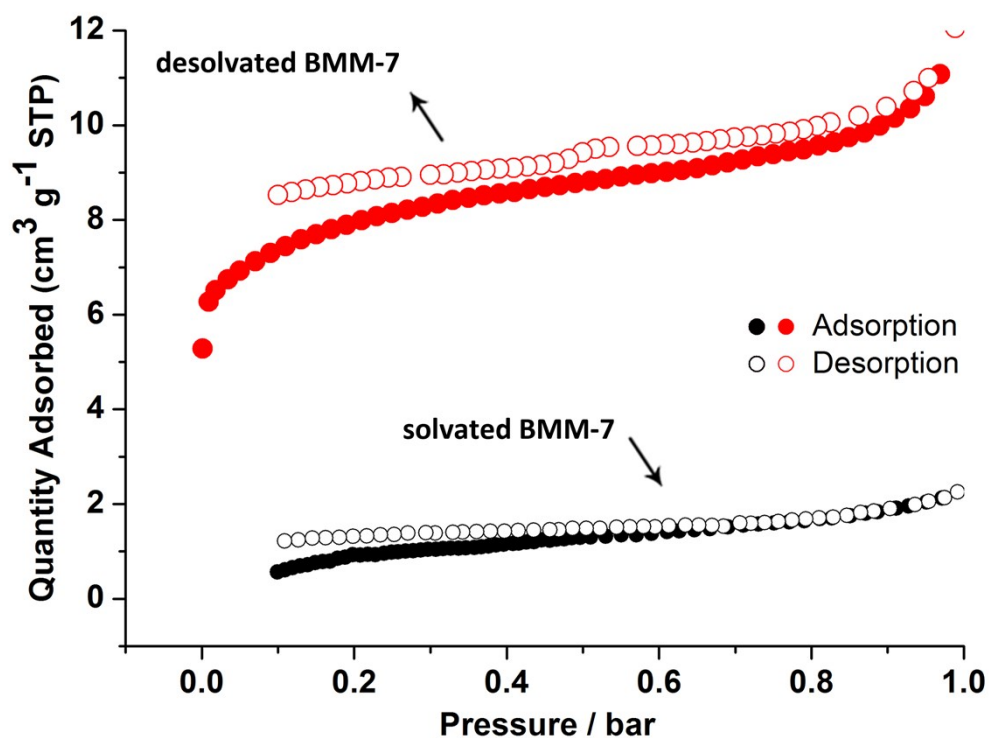

**Figure S8** The Experimental nitrogen adsorption (closed) and desorption (open) isotherms at 77 K for BMM-7.

## S7 References.

- [S1] O. V. Dolomanov, L. J. Bourhis, R. J. Gildea, J. A. K. Howard and H. Puschmann, *J. Appl. Cryst.* **2009**, *42*, 339.
- [S2] SHELXS, G.M. Sheldrick, *Acta Cryst.* **2008**, *A64*, 112.
- [S3] SHELXL, G.M. Sheldrick, *Acta Cryst.* **2008**, *A64*, 112.
- [S4] (a) A. L. Spek, *J. Appl. Crystallogr.* **2003**, *36*, 7; (b) P. v.d. Sluis and A. L. Spek, *Acta Crystallogr., Sect. A*, **1990**, *46*, 194.
